# Supplementary material for: Relaxed targeting rules help PIWI proteins silence transposons
Source: PubMed Central journal article supplement (PMC10338343; doi:10.1038/s41586-023-06257-4), 2023-06-21
Supplement: 41586_2023_6257_MOESM1_ESM.pdf [file 41586_2023_6257_MOESM1_ESM.pdf]

**Supplementary information**

---

**Relaxed targeting rules help PIWI proteins  
silence transposons**

---

In the format provided by the  
authors and unedited

Extended Data Fig. 1c

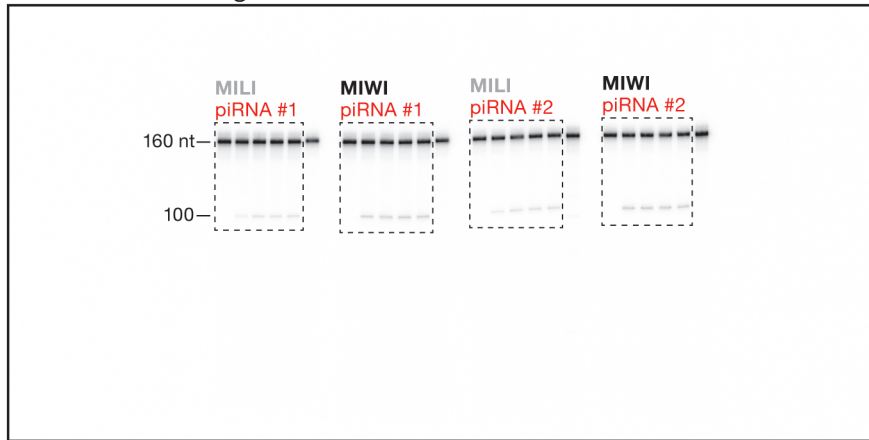

Extended Data Fig. 1c

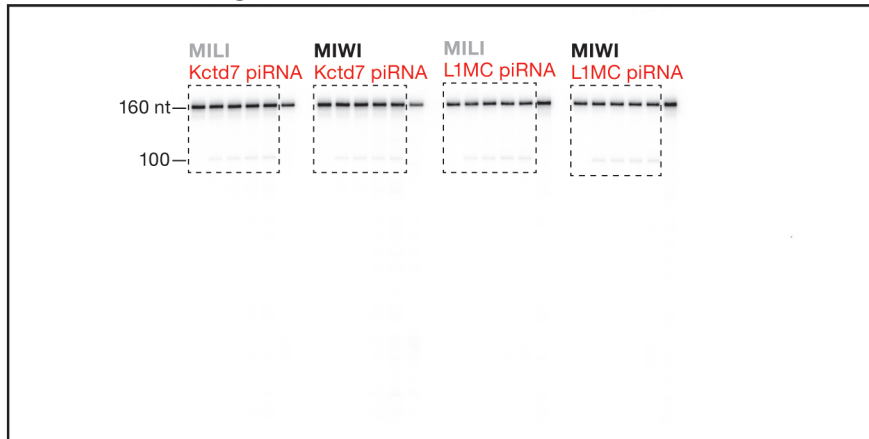

Extended Data Fig. 1c

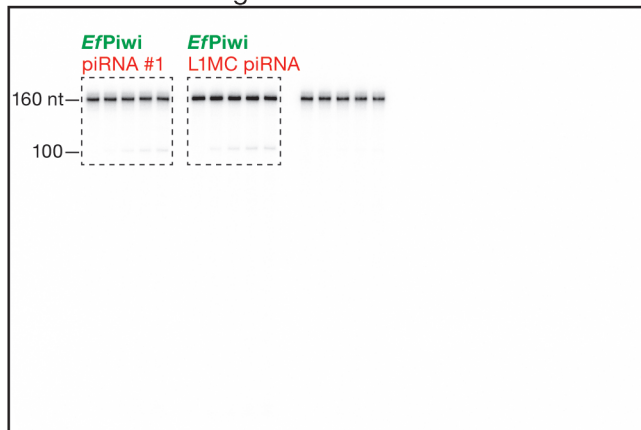

Extended Data Fig. 1d

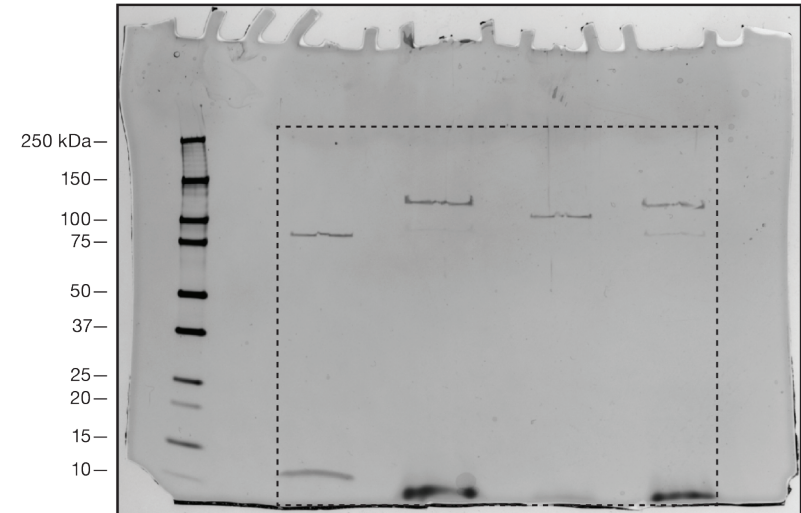

Extended Data Fig. 1e

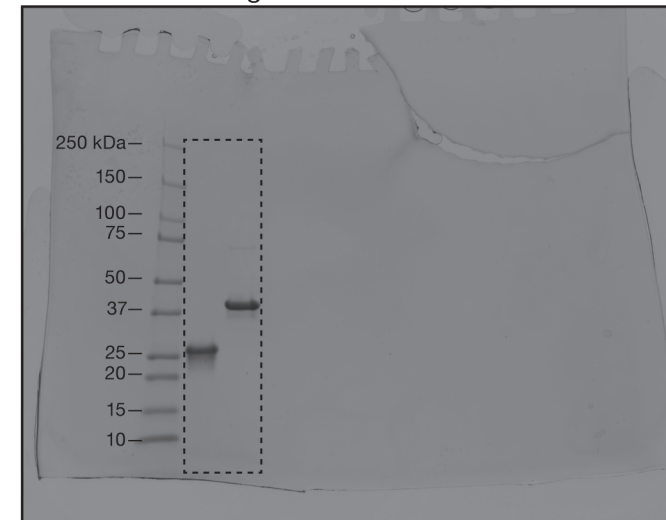

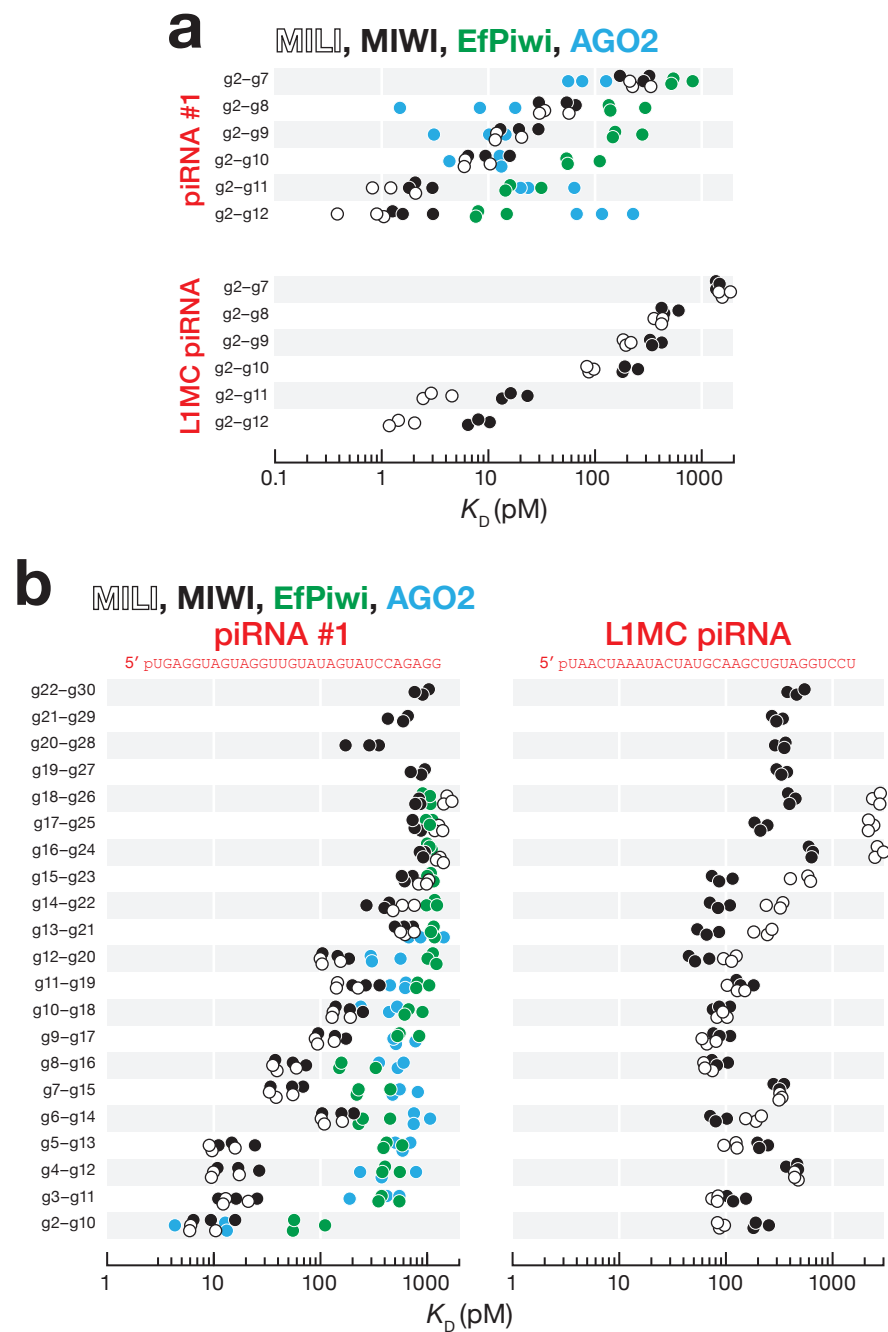

**Supplementary Figure 2.** Binding affinities ( $K_D$ ) of MIWI, MILI, EfPiwi, and mouse AGO2 for canonical (a) and non-canonical (b) target sites. Data are from three independent trials. Mean and the standard deviation of the data are shown in Figs. 1c and 1d.

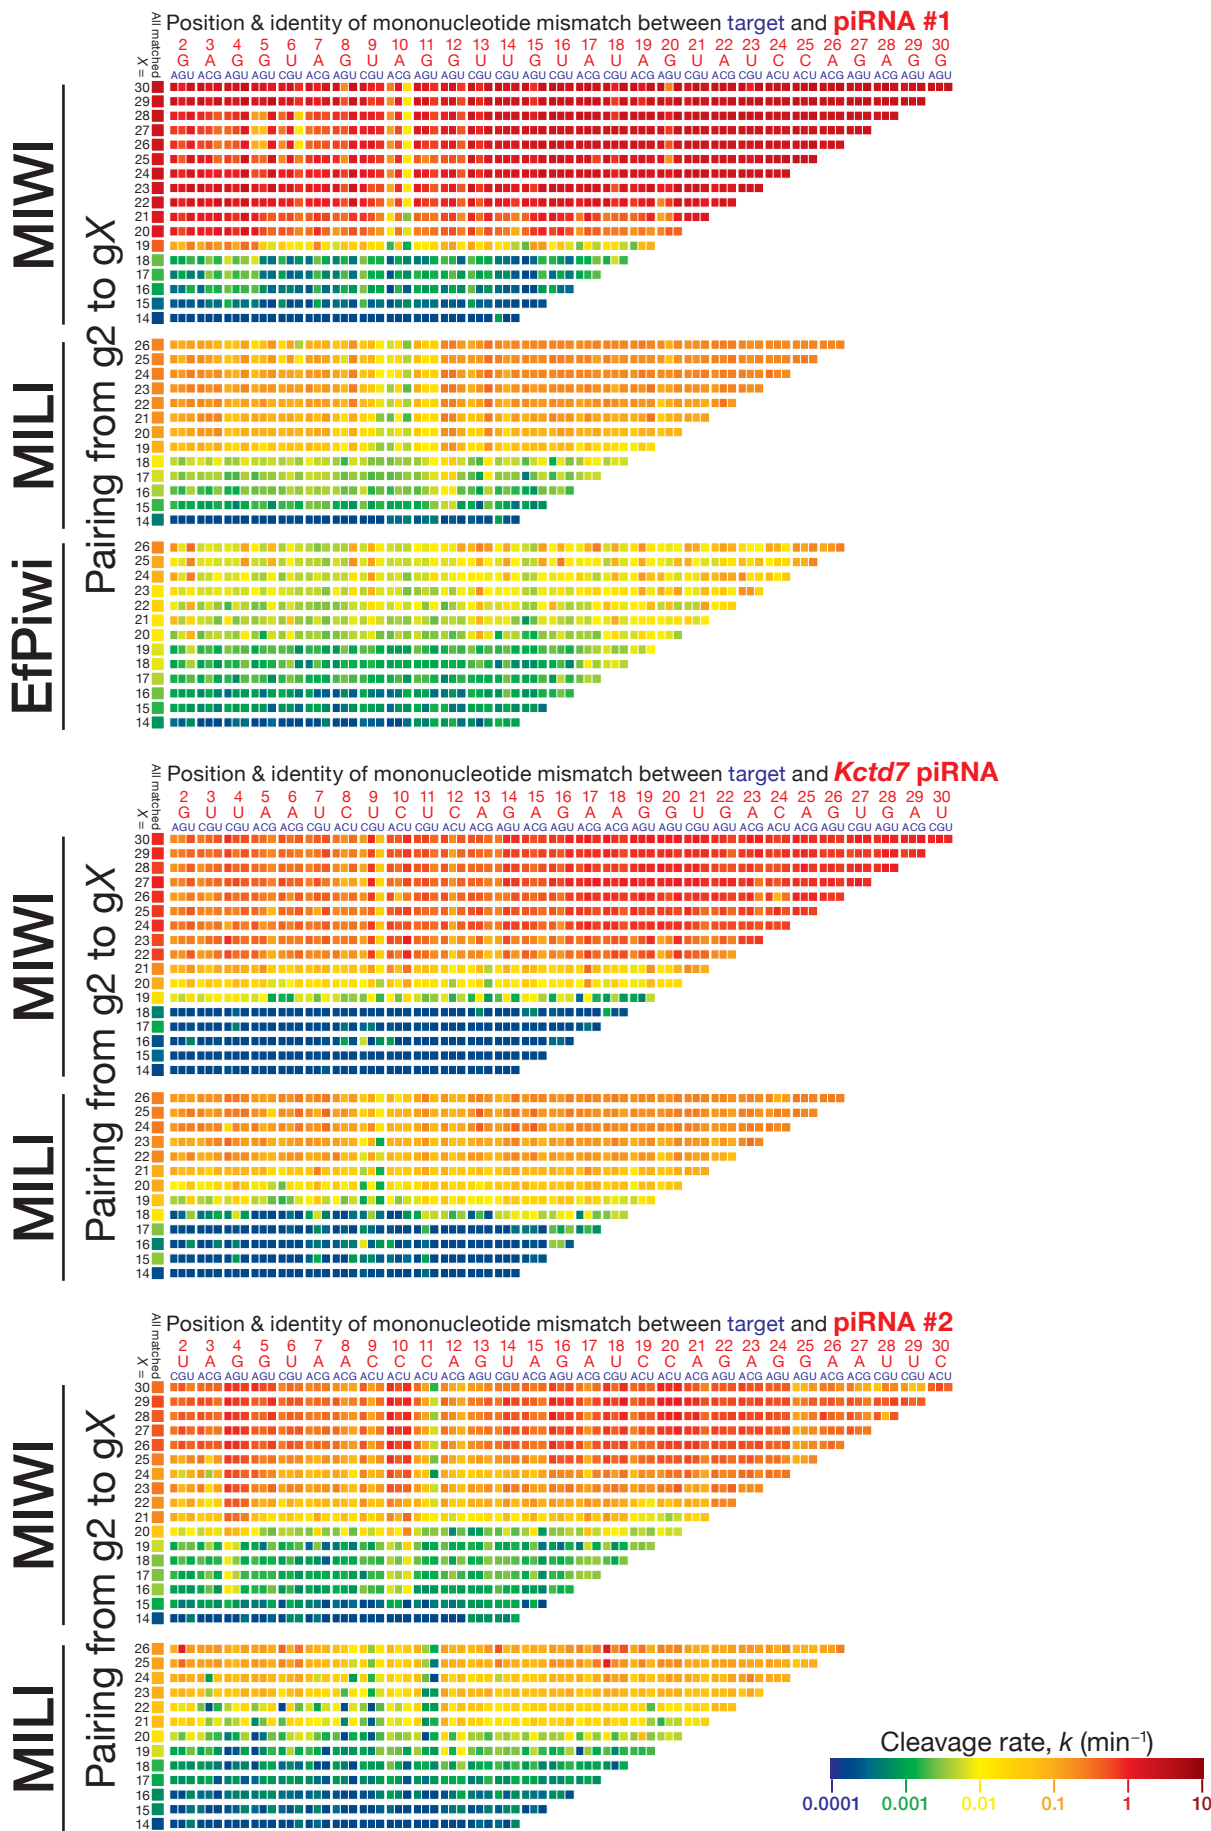

Supplementary Figure 3. MILI, MIWI, and EfPiwi pre-steady-state cleavage rates for piRNA #1, Kctd7 piRNA, or piRNA #2 targets with a single unpaired nucleotide.

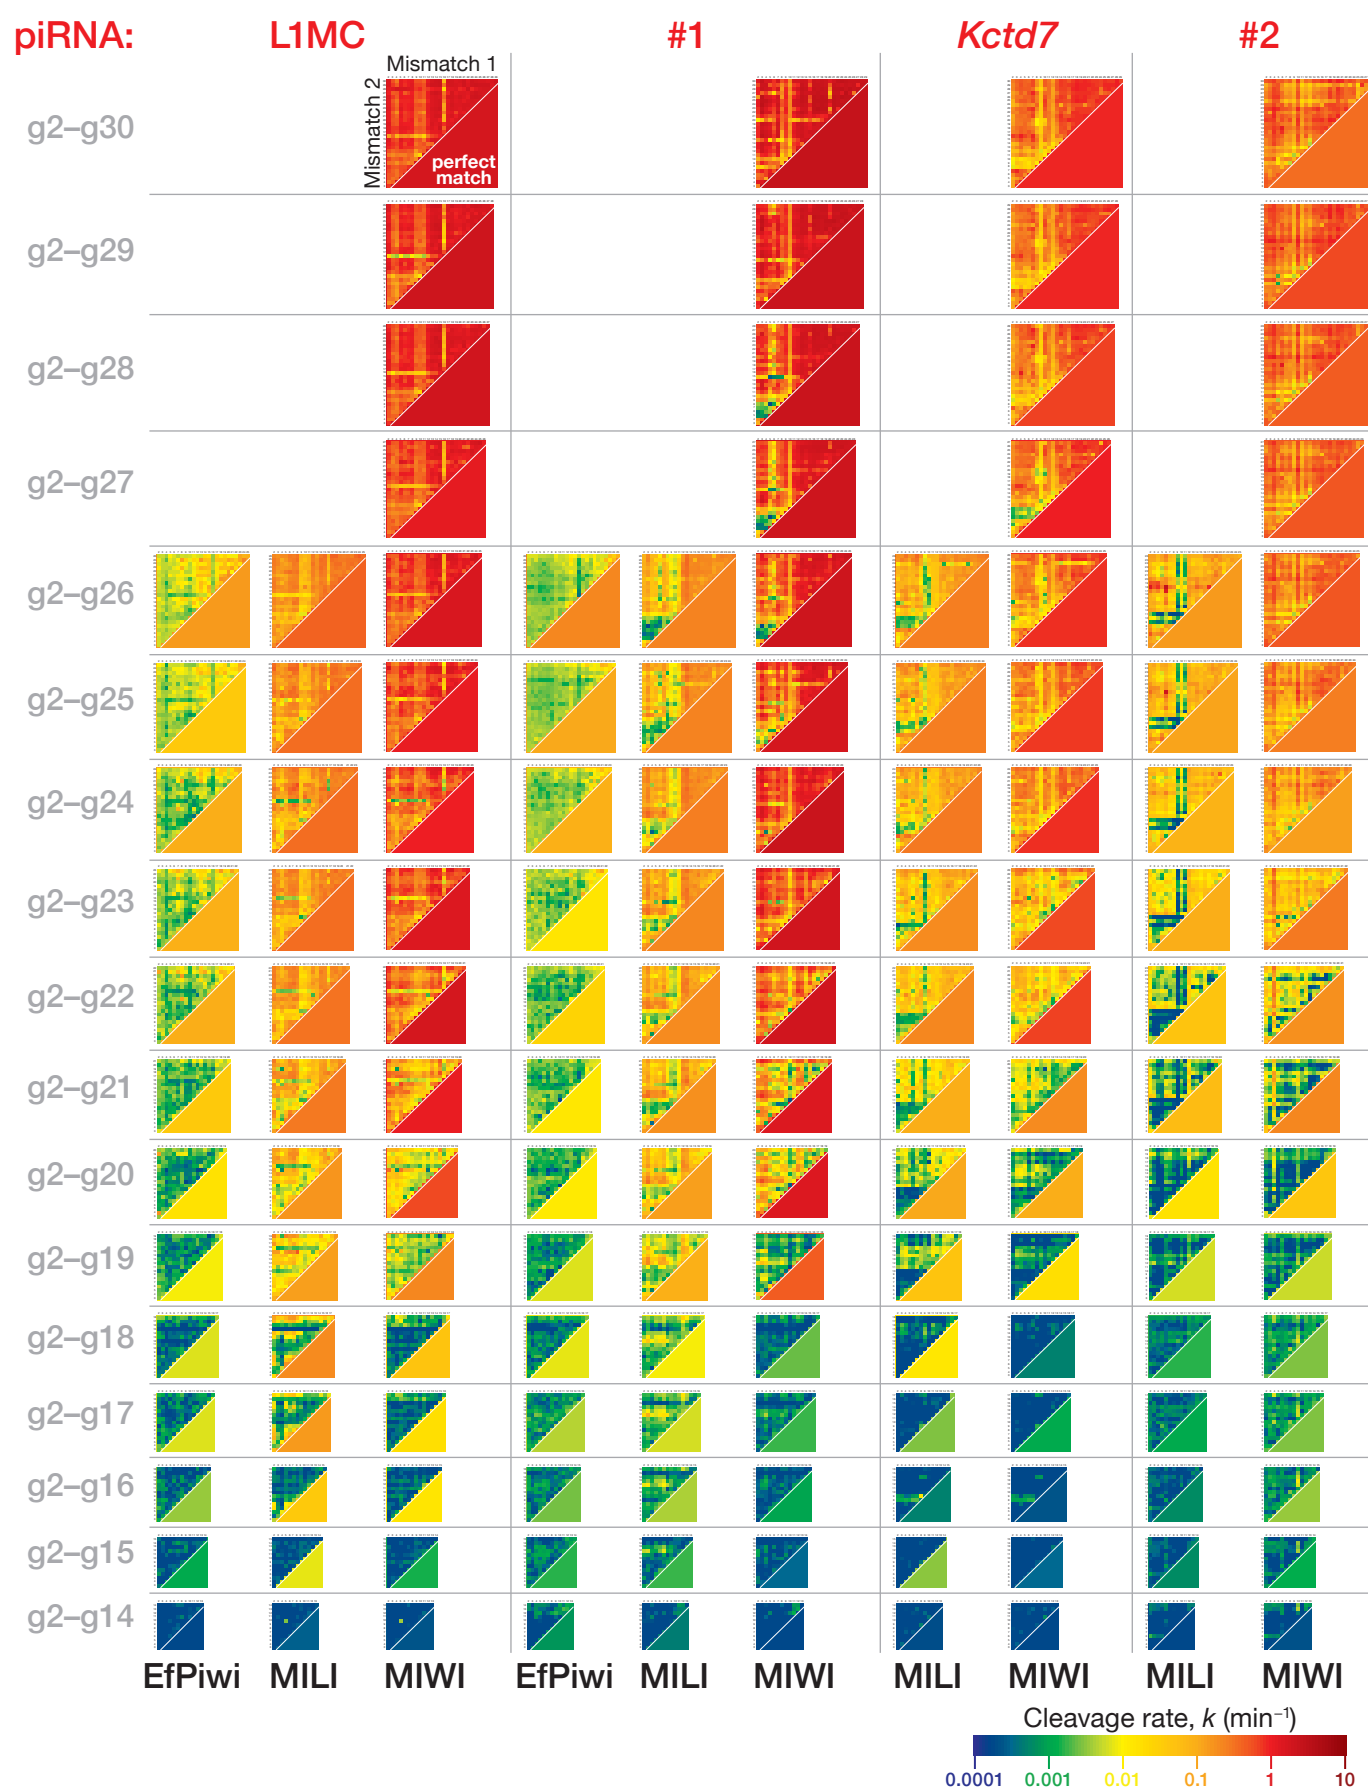

**Supplementary Figure 4.** MILI, MIWI, EfPiwi pre-steady-state cleavage rates for L1MC piRNA, piRNA #1, *Kctd7* piRNA, or piRNA #2 targets with two unpaired nucleotides.

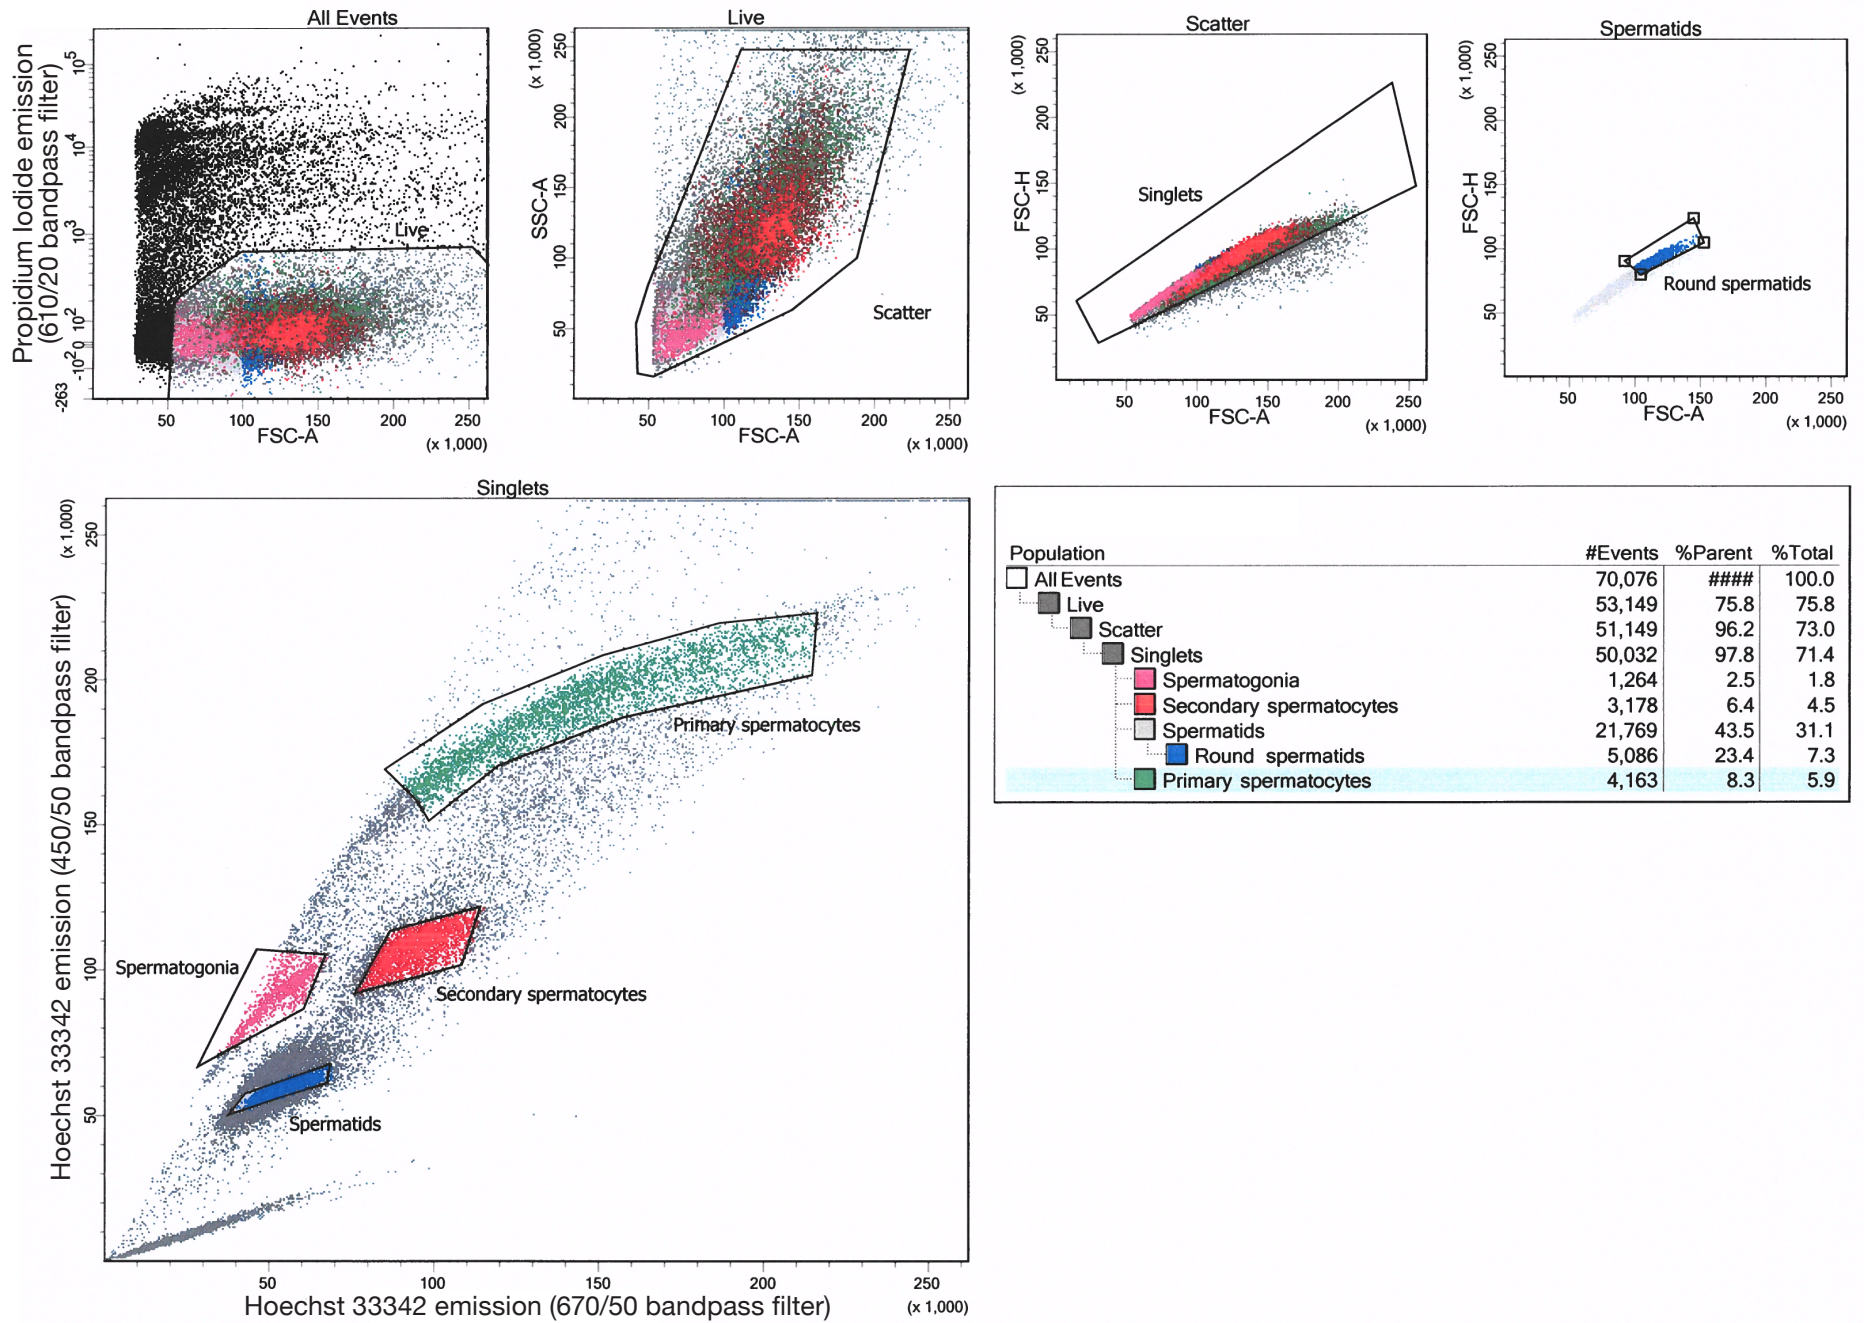

**Supplementary Figure 5. FACS gating strategy to purify mouse primary germ cells**
