# Supplementary material for: Relaxed targeting rules help PIWI proteins silence transposons
Source: PubMed Central journal article supplement (PMC10338343; doi:10.1038/s41586-023-06257-4), 2023-06-21
Supplement: 41586_2023_6257_MOESM5_ESM.pdf [file 41586_2023_6257_MOESM5_ESM.pdf]

**Supplementary Table 2.** Total number of “*pi2*, *pi9*, *pi17* piRNA:cleavage site” pairs for which the abundance of cleavage product decreased >8-fold in *pi2*<sup>-/-</sup>; *pi9*<sup>-/-</sup>; *pi17*<sup>-/-</sup> triple mutant mice compared to wild-type controls.

| <b>Contiguous pairing (Fig. 3b)</b>                                  |         |
|----------------------------------------------------------------------|---------|
| g2g10                                                                | 444,728 |
| g2g11                                                                | 192,056 |
| g2g12                                                                | 61,309  |
| g2g13                                                                | 19,869  |
| g2g14                                                                | 9,445   |
| g2g15                                                                | 2,756   |
| g2g16                                                                | 2,014   |
| g2g17                                                                | 862     |
| g2g18                                                                | 257     |
| g2g19                                                                | 225     |
| g2g20                                                                | 152     |
| <b>Mononucleotide mismatches (Fig. 3c and Extended Data Fig. 8a)</b> |         |
| g2g16, mismatch at g2                                                | 2,153   |
| g2g16, mismatch at g3                                                | 1,173   |
| g2g16, mismatch at g4                                                | 848     |
| g2g16, mismatch at g5                                                | 3,020   |
| g2g16, mismatch at g6                                                | 842     |
| g2g16, mismatch at g7                                                | 1,111   |
| g2g16, mismatch at g8                                                | 1,146   |
| g2g16, mismatch at g9                                                | 1,123   |
| g2g16, mismatch at g10                                               | 1,091   |
| g2g16, mismatch at g11                                               | 1,160   |
| g2g16, mismatch at g12                                               | 1,456   |
| g2g16, mismatch at g13                                               | 1,262   |
| g2g16, mismatch at g14                                               | 1,197   |
| g2g16, mismatch at g15                                               | 1,280   |
| g2g16, mismatch at g16                                               | 5,388   |
| g2g17, mismatch at g2                                                | 592     |
| g2g17, mismatch at g3                                                | 311     |
| g2g17, mismatch at g4                                                | 322     |
| g2g17, mismatch at g5                                                | 323     |
| g2g17, mismatch at g6                                                | 263     |
| g2g17, mismatch at g7                                                | 225     |

|                        |       |
|------------------------|-------|
| g2g17, mismatch at g8  | 304   |
| g2g17, mismatch at g9  | 376   |
| g2g17, mismatch at g10 | 364   |
| g2g17, mismatch at g11 | 436   |
| g2g17, mismatch at g12 | 445   |
| g2g17, mismatch at g13 | 539   |
| g2g17, mismatch at g14 | 423   |
| g2g17, mismatch at g15 | 543   |
| g2g17, mismatch at g16 | 612   |
| g2g17, mismatch at g17 | 1,526 |
| g2g18, mismatch at g2  | 235   |
| g2g18, mismatch at g3  | 121   |
| g2g18, mismatch at g4  | 173   |
| g2g18, mismatch at g5  | 179   |
| g2g18, mismatch at g6  | 84    |
| g2g18, mismatch at g7  | 158   |
| g2g18, mismatch at g8  | 103   |
| g2g18, mismatch at g9  | 160   |
| g2g18, mismatch at g10 | 174   |
| g2g18, mismatch at g11 | 193   |
| g2g18, mismatch at g12 | 258   |
| g2g18, mismatch at g13 | 197   |
| g2g18, mismatch at g14 | 175   |
| g2g18, mismatch at g15 | 270   |
| g2g18, mismatch at g16 | 210   |
| g2g18, mismatch at g17 | 340   |
| g2g18, mismatch at g18 | 600   |
| g2g19, mismatch at g2  | 143   |
| g2g19, mismatch at g3  | 58    |
| g2g19, mismatch at g4  | 53    |
| g2g19, mismatch at g5  | 30    |
| g2g19, mismatch at g6  | 48    |
| g2g19, mismatch at g7  | 23    |
| g2g19, mismatch at g8  | 77    |
| g2g19, mismatch at g9  | 61    |
| g2g19, mismatch at g10 | 85    |
| g2g19, mismatch at g11 | 120   |

|                                                             |     |
|-------------------------------------------------------------|-----|
| g2g19, mismatch at g12                                      | 144 |
| g2g19, mismatch at g13                                      | 62  |
| g2g19, mismatch at g14                                      | 80  |
| g2g19, mismatch at g15                                      | 66  |
| g2g19, mismatch at g16                                      | 164 |
| g2g19, mismatch at g17                                      | 56  |
| g2g19, mismatch at g18                                      | 254 |
| g2g19, mismatch at g19                                      | 210 |
| <b>Mononucleotide target indels (Extended Data Fig. 9a)</b> |     |
| g2g17, target deletion between g3 and g4                    | 113 |
| g2g17, target deletion between g4 and g5                    | 97  |
| g2g17, target deletion between g5 and g6                    | 124 |
| g2g17, target deletion between g6 and g7                    | 367 |
| g2g17, target deletion between g7 and g8                    | 106 |
| g2g17, target deletion between g8 and g9                    | 97  |
| g2g17, target deletion between g9 and g10                   | 97  |
| g2g17, target deletion between g10 and g11                  | 124 |
| g2g17, target deletion between g11 and g12                  | 211 |
| g2g17, target deletion between g12 and g13                  | 136 |
| g2g17, target deletion between g13 and g14                  | 114 |
| g2g17, target deletion between g14 and g15                  | 195 |
| g2g17, target deletion between g15 and g16                  | 190 |
| g2g17, target deletion between g16 and g17                  | 190 |
| g2g17, target insertion between g2 and g3                   | 353 |
| g2g17, target insertion between g3 and g4                   | 173 |
| g2g17, target insertion between g4 and g5                   | 117 |
| g2g17, target insertion between g5 and g6                   | 173 |
| g2g17, target insertion between g6 and g7                   | 138 |
| g2g17, target insertion between g7 and g8                   | 119 |
| g2g17, target insertion between g8 and g9                   | 99  |
| g2g17, target insertion between g9 and g10                  | 120 |
| g2g17, target insertion between g10 and g11                 | 97  |
| g2g17, target insertion between g11 and g12                 | 192 |
| g2g17, target insertion between g12 and g13                 | 304 |
| g2g17, target insertion between g13 and g14                 | 168 |
| g2g17, target insertion between g14 and g15                 | 201 |
| g2g17, target insertion between g15 and g16                 | 306 |

|                                             |       |
|---------------------------------------------|-------|
| g2g17, target insertion between g16 and g17 | 227   |
| <b>Contiguous pairing (Fig. 3e)</b>         |       |
| g2g15, piRNA <30 pM                         | 1,192 |
| g2g15, piRNA 30–50 pM                       | 365   |
| g2g15, piRNA 50–100 pM                      | 467   |
| g2g15, piRNA 100–500 pM                     | 598   |
| g2g15, piRNA >500 pM                        | 134   |
| g3g16, piRNA <30 pM                         | 498   |
| g3g16, piRNA 30–50 pM                       | 347   |
| g3g16, piRNA 50–100 pM                      | 310   |
| g3g16, piRNA 100–500 pM                     | 927   |
| g3g16, piRNA >500 pM                        | 67    |
| g4g17, piRNA <30 pM                         | 464   |
| g4g17, piRNA 30–50 pM                       | 186   |
| g4g17, piRNA 50–100 pM                      | 177   |
| g4g17, piRNA 100–500 pM                     | 264   |
| g4g17, piRNA >500 pM                        | 20    |
| g5g18, piRNA <30 pM                         | 394   |
| g5g18, piRNA 30–50 pM                       | 257   |
| g5g18, piRNA 50–100 pM                      | 233   |
| g5g18, piRNA 100–500 pM                     | 230   |
| g5g18, piRNA >500 pM                        | 66    |

**Supplementary Table 3.** Mouse strains used in this study.

| Strain                                                                                                                       | Two guide RNAs sequences                                            | Deletion coordinates (mm10) | Genotyping mutant allele                                           |                          | Genotyping wild-type allele                                         |               |
|------------------------------------------------------------------------------------------------------------------------------|---------------------------------------------------------------------|-----------------------------|--------------------------------------------------------------------|--------------------------|---------------------------------------------------------------------|---------------|
|                                                                                                                              |                                                                     |                             | Primers                                                            | Amplicon size            | Primers                                                             | Amplicon size |
| <i>pi2</i> <sup>-/-</sup><br>( <i>pi2</i> <sup>em1PdZ/em1PdZ</sup> )                                                         | GCT TGA TCG TCA<br>GGG ACT AA<br><br>TCA GAG GCT AAG<br>TCC CAT TA  | chr2:92539403–<br>92542146  | CCA CCT CCA GCT CTT<br>CCT CT<br><br>TTA GCT GCC TCA AGA<br>GTG GC | Mut 732 bp               | CCC TTG ATC ATA CCC<br>ACC TCC<br><br>TGT CAA CAA ACC CCC<br>AGG AC | 501 bp        |
| <i>pi7</i> <sup>-/-</sup><br>( <i>pi7</i> <sup>em1PdZ/em1PdZ</sup> )                                                         | CCG GGG CCT GCA<br>AAG AAG AA<br><br>GAC CAC CCT GAA<br>ACC TGT AA  | chr7:73816369–<br>73816663  | CAT GT CGT TGC TGG<br>GCA AAA<br><br>GTG GAC CTG TTG CAG<br>GAA CT | WT 983 bp<br>Mut 664 bp  | CCC TTT GCC TAG GAC<br>TGT GG<br><br>CAT GTC GTT GCTG GGC<br>AAA A  | 488 bp        |
| <i>pi9</i> <sup>-/-</sup><br>( <i>pi9</i> <sup>em1PdZ/em1PdZ</sup> )                                                         | GGC CTG CAG CAT<br>GCT CTT GC<br><br>GTT TAG GGT TTG<br>GGT AAG TT  | chr9:67733702–<br>67734069  | AGA TCC AGA GGC AGG<br>CTT TT<br><br>TGC CAG CT CTC TTG<br>TCA GAA | WT 774 bp<br>Mut 393 bp  | CGT GGA CAA CAG GGA<br>CAC TA<br><br>CCA CCC CAA ATG CCA<br>TGA AG  | 307 bp        |
| <i>pi17</i> <sup>-/-</sup><br>( <i>pi17</i> <sup>em1PdZ/em1PdZ</sup> )<br>reported in<br>Ref. <sup>10</sup> ;<br>MGI 6441981 | GTC CCT TCA CAC<br>GGC CGT TTA<br><br>GCT CTG TCT GAC<br>AAC GGG AC | chr17:27324887<br>–27325439 | CGC AGC CCA TCC ATT<br>TCT TG<br><br>GAC TAG CGC CAG TTT<br>CCA CT | WT 1000 bp<br>Mut 44 8bp | AGG TCT GCA CGT AGT<br>CTC CT<br><br>GGG TGT GGC CAC ATG<br>TAT CA  | 368 bp        |

**Supplementary Table 4.** Sequences of oligonucleotides used in this study

|                                                              | Name                                  | Sequence (5'-to-3')                                                                                             | Notes                                                                                                                                                                       |
|--------------------------------------------------------------|---------------------------------------|-----------------------------------------------------------------------------------------------------------------|-----------------------------------------------------------------------------------------------------------------------------------------------------------------------------|
| piRNA synthetic guides                                       | piRNA #1 in MIWI                      | /phos/UGAGGUAGUAGGUUGUAUAGUAUCCAGAGG                                                                            | 5' monophosphorylated RNA                                                                                                                                                   |
|                                                              | piRNA #1 in MILI                      | /phos/UGAGGUAGUAGGUUGUAUAGUAUCCA                                                                                |                                                                                                                                                                             |
|                                                              | piRNA #1 in AGO2                      | /phos/UGAGGUAGUAGGUUGUAUAGU                                                                                     |                                                                                                                                                                             |
|                                                              | L1MC piRNA in MIWI                    | /phos/UAACUAAAUACUAUGCAAGCUGUAGGUCCU                                                                            |                                                                                                                                                                             |
|                                                              | L1MC piRNA in MILI                    | /phos/UAACUAAAUACUAUGCAAGCUGUAGG                                                                                |                                                                                                                                                                             |
|                                                              | Kctd7 piRNA in MIWI                   | /phos/UGUAAAUCUCUCAGAGAAGGUGACAGUGAU                                                                            |                                                                                                                                                                             |
|                                                              | Kctd7 piRNA in MILI                   | /phos/UGUAAAUCUCUCAGAGAAGGUGACAG                                                                                |                                                                                                                                                                             |
|                                                              | piRNA # 2 in MIWI                     | /phos/UUAGGUAACCCAGUAGA UCCAGAGGAAUUC                                                                           |                                                                                                                                                                             |
|                                                              | piRNA # 2 in MILI                     | /phos/UUAGGUAACCCAGUAGA UCCAGAGGA                                                                               |                                                                                                                                                                             |
| Capture oligonucleotides                                     | piRNA # 1                             | Bio-mAmUmA mGmAmC mUmGmC mGmAmC mAmAmU mAmGmC mCmUmA mCmCmU mCmCmG mAmAmC mGmGmC mGmAmG                         | 5' biotinylated fully 2'-O-methylated RNA complementary to piRNA nucleotides g2-g8 and g13-g16                                                                              |
|                                                              | L1MC piRNA                            | Bio-mAmAmA mAmAmA mAmAmA mAmUmG mAmGmA mGmGmC mAmUmA mCmAmC mUmUmU mAmGmU mUmAmC mUmGmC                         |                                                                                                                                                                             |
|                                                              | Kctd7 piRNA                           | Bio-mAmAmG mGmAmA mCmAmG mAmAmG mAmGmA mGmCmU mCmUmA mCmAmC mGmAmU mUmAmA mCmAmC mUmGmC                         |                                                                                                                                                                             |
|                                                              | piRNA #2                              | Bio-mAmCmU mAmCmU mGmCmA mGmCmA mCmAmA mCmCmC mUmAmC mCmAmA mAmUmU mAmCmC mUmAmA mCmUmG mC                      |                                                                                                                                                                             |
| Competitor oligonucleotides                                  | piRNA # 1                             | Bio-CTCGCCGTTTCGGAGGTAGGCTATTGTGCGCAGTCTAT                                                                      | 5' biotinylated DNA fully complementary to capture oligonucleotide                                                                                                          |
|                                                              | L1MC piRNA                            | Bio-GCAGTAACTAAAGTGTATGCCTCTCATTTTTTTTTTT                                                                       |                                                                                                                                                                             |
|                                                              | Kctd7 piRNA                           | Bio-GCAGTGTTAATCGTGTAGAGCTCTCTTCTGTTTCCTT                                                                       |                                                                                                                                                                             |
|                                                              | piRNA #2                              | Bio-GCAGTTAGGTAATTTGGTAGGGTTGTGCTGCAGTAGT                                                                       |                                                                                                                                                                             |
| Primers for PCR amplification of targets for cleavage assays | Forward primer                        | GCGTAATACGACTCACTATAGGGTTTTAATGAATACGATTT                                                                       | DNA primers used with pGL2 plasmid as the template to amplify dsDNA for T7 in vitro transcription of cleavage targets; g2-g30 fully complementary target site is underlined |
|                                                              | Reverse primer for piRNA #1 target    | ACACTATAGATTTTATACCTAGTTAAACAGCGGAAGTGTGTA TAAAAGGTTGAGGTAGTAGGTTGTATAGTATCCAGAGGATA GGTCTCCAATTCATTATCAGTGCAAT |                                                                                                                                                                             |
|                                                              | Reverse primer for L1MC piRNA target  | ACACTATAGATTTTATACCTAGTTAAACAGCGGAAGTGTGTA TAAAAGGTTAACTAAATACTATGCAAGCTGTAGGTCCTATA GGTCTCCAATTCATTATCAGTGCAAT |                                                                                                                                                                             |
|                                                              | Reverse primer for Kctd7 piRNA target | ACACTATAGATTTTATACCTAGTTAAACAGCGGAAGTGTGTA TAAAAGGTTGTTAATCTCTCAGAGAAGGTGACAGTGATATA GGTCTCCAATTCATTATCAGTGCAAT |                                                                                                                                                                             |

|                                                           |                                                                                                                                                                                                                                                        |                                                                                                                       |                                                                                               |
|-----------------------------------------------------------|--------------------------------------------------------------------------------------------------------------------------------------------------------------------------------------------------------------------------------------------------------|-----------------------------------------------------------------------------------------------------------------------|-----------------------------------------------------------------------------------------------|
|                                                           | Reverse primer for piRNA #2 target                                                                                                                                                                                                                     | ACACTATAGATTTTATACCTAGTTAAACAGCGGAAGTGTGTA<br>TAAAAGGTTTAGGTAACCCAGTAGATCCAGAGGAATTCATA<br>GGTCTCCAATTCATTATCAGTGCAAT |                                                                                               |
| RBNS primers and oligos                                   | Target library                                                                                                                                                                                                                                         | GAGUUCUACAGUCCGACGAUCNNNNNNNNNNNNNNNNNNNNNN<br>UGGAAUUCUCGGGUGCCAA                                                    | RNA                                                                                           |
|                                                           | RT primer                                                                                                                                                                                                                                              | CCTTGGCACCCGAGAATTCCA                                                                                                 | DNA                                                                                           |
|                                                           | Forward (P5) primer                                                                                                                                                                                                                                    | AATGATACGGCGACCACCGAGATCTACACGTTC AGAGTTCTACAGTCCGA                                                                   | DNA primers for amplification of RBNS library, XXXXXX represents 6-nt sequencing barcode      |
|                                                           | Reverse (P7) primer                                                                                                                                                                                                                                    | CAAGCAGAAGACGGCATAACGAGATXXXXXX<br>GTGACTGGAGTTCCTTGGCACCCGAGAATTCCA                                                  |                                                                                               |
|                                                           | DNA blocking oligos                                                                                                                                                                                                                                    | TTGGCACCCGAGAAT<br>GTCGGACTGTAGAACTC                                                                                  | DNA                                                                                           |
| Targets used in filter binding assay for piRNA #1 in MIWI | piRNA #1 g2-g10                                                                                                                                                                                                                                        | /phos/AAAAAAAAAAAAAAAAAAAAUACUACCUCA                                                                                  | 5' monophosphorylated RNA                                                                     |
|                                                           | piRNA #1 g8-g16                                                                                                                                                                                                                                        | /phos/AAAAAAAAAAAAAAAAACAACCUACAAAAAA                                                                                 |                                                                                               |
| CNS primers and oligos                                    | Forward primer                                                                                                                                                                                                                                         | GCGTAATACGACTCACTATAGG GTTCAGAGTTCACAGTCCGACGATC                                                                      | DNA primers for adding T7 promoter to TWIST Bioscience DNA oligo pool of CNS targets          |
|                                                           | Reverse primer                                                                                                                                                                                                                                         | CCTTGGCACCCGAGAATTCCA                                                                                                 |                                                                                               |
|                                                           | DNA blocking oligos                                                                                                                                                                                                                                    | CCTTGGCACCCGAGAA                                                                                                      | DNA                                                                                           |
|                                                           |                                                                                                                                                                                                                                                        | TCGGACTGTAGAACTCTGAAC                                                                                                 |                                                                                               |
|                                                           | RT primer                                                                                                                                                                                                                                              | CCTTGGCACCCGAGAATTCCA                                                                                                 | DNA                                                                                           |
|                                                           | Forward (P5) primer                                                                                                                                                                                                                                    | AATGATACGGCGACCACCGAGATCTACACGTTC AGAGTTCTACAGTCCGA                                                                   | DNA primers for final amplification of CNS library, XXXXXX represents 6-nt sequencing barcode |
|                                                           | Reverse (P7) primer                                                                                                                                                                                                                                    | CAAGCAGAAGACGGCATAACGAGATXXXXXX<br>GTGACTGGAGTTCCTTGGCACCCGAGAATTCCA                                                  |                                                                                               |
| Equimolar mix of five spike-in RNA oligonucleotides       | /phos/UCGUGGAUGUCGUACGUACUGGAAUUCUCGGGUGCCAAGG<br>/phos/UGCUGGAUGUCCAACGUACUGGAAUUCUCGGGUGCCAAGG<br>/phos/ACCUGGAUGUGGAACGUACUGGAAUUCUCGGGUGCCAAGG<br>/phos/CGAACGUACUAUUUACAAAUGGAAUUCUCGGGUGCCAAGG<br>/phos/CGAACGUACUAUUUAGUUAUGGAAUUCUCGGGUGCCAAGG | 5' monophosphorylated RNA                                                                                             |                                                                                               |
| Small RNA sequencing adapters, oligos, and primers        | Equimolar mix of nine spike-in RNA oligonucleotides                                                                                                                                                                                                    | /phos/UGCUAGUCUGUUAUCGACCUGACCUCAUAG                                                                                  | 5' monophosphorylated RNA                                                                     |
|                                                           |                                                                                                                                                                                                                                                        | /phos/UGCUAGUCUGUUCGAUACCUGACCUCAUAG                                                                                  |                                                                                               |
|                                                           |                                                                                                                                                                                                                                                        | /phos/UGCUAGUCUGUUGUCACGAAGACCUCAUAG                                                                                  |                                                                                               |
|                                                           |                                                                                                                                                                                                                                                        | /phos/UGCUAGUCUUAUCGACCUCUCCAUAG                                                                                      |                                                                                               |
|                                                           |                                                                                                                                                                                                                                                        | /phos/UGCUAGUCUUCGAUACCUCUCCAUAG                                                                                      |                                                                                               |
|                                                           |                                                                                                                                                                                                                                                        | /phos/UGCUAGUCUUGUCACGAACCUCAUAG                                                                                      |                                                                                               |
|                                                           |                                                                                                                                                                                                                                                        | /phos/UGCUAGUUAUCGACCUUCAUAG                                                                                          |                                                                                               |
| /phos/UGCUAGUUCGAUACCUUCAUAG                              |                                                                                                                                                                                                                                                        |                                                                                                                       |                                                                                               |

|                                                                                  |                                                                      |                                                                      |                                                                                                                                                                                                 |
|----------------------------------------------------------------------------------|----------------------------------------------------------------------|----------------------------------------------------------------------|-------------------------------------------------------------------------------------------------------------------------------------------------------------------------------------------------|
|                                                                                  |                                                                      | /phos/UGCUAGUUGUCACGAAUCAUAG                                         |                                                                                                                                                                                                 |
|                                                                                  | 3' DNA adapter                                                       | /rApp/NNNGTCNNNTAGNNNTGGAATTCTCGGGTGCCAAGG/ddC/                      | 5' adenylated, 3' dideoxycytosine blocked DNA adapter                                                                                                                                           |
|                                                                                  | Equimolar mix of two 5' RNA adaptors                                 | GUUCAGAGUUCUACAGUCCGACGAUCNNNCGANNUACNNN                             | RNA                                                                                                                                                                                             |
|                                                                                  |                                                                      | GUUCAGAGUUCUACAGUCCGACGAUCNNNAUCNNNAGUNNN                            |                                                                                                                                                                                                 |
|                                                                                  | RT primer                                                            | CCTTGGCACCCGAGAATTCCA                                                | DNA                                                                                                                                                                                             |
|                                                                                  | Forward (P5) primer                                                  | AATGATACGGCGACCACCGAGATCTACACGTTT AGAGTTCTACAGTCCGA                  | DNA primers for final amplification of CNS library, XXXXXX represents 6-nt sequencing barcode                                                                                                   |
|                                                                                  | Reverse (P7) primer                                                  | CAAGCAGAAGACGGCATAACGAGATXXXXXX<br>GTGACTGGAGTTCCTTGGCACCCGAGAATTCCA |                                                                                                                                                                                                 |
| Three sets of unique molecular identifier (UMI) containing RNA-seq adapters      | Adapter set 1                                                        | /phos/CCNNNNNAGATCGGAAGAGCACACGTCT                                   | Two adapters in each set are first annealed to each other in three separate tubes, then the three annealed sets are equimolarly mixed to a final total concentration of 3.3 $\mu$ M each duplex |
|                                                                                  |                                                                      | ACACTCTTTCCCTACACGACGCTCTTCCGATCTNNNNNGGGT                           |                                                                                                                                                                                                 |
|                                                                                  | Adapter set 2                                                        | /phos/GATNNNNNAGATCGGAAGAGCACACGTCT                                  |                                                                                                                                                                                                 |
|                                                                                  |                                                                      | ACACTCTTTCCCTACACGACGCTCTTCCGATCTNNNNNATCT                           |                                                                                                                                                                                                 |
|                                                                                  | Adapter set 3                                                        | /phos/TGANNNNNAGATCGGAAGAGCACACGTCT                                  |                                                                                                                                                                                                 |
|                                                                                  |                                                                      | ACACTCTTTCCCTACACGACGCTCTTCCGATCTNNNNNTCAT                           |                                                                                                                                                                                                 |
| Adapters and primers for cloning and sequencing long 5' mono-phosphorylated RNAs | Equimolar mix of two 5' RNA adaptors                                 | GUUCAGAGUUCUACAGUCCGACGAUCNNNCGANNUACNNN                             | RNA                                                                                                                                                                                             |
|                                                                                  |                                                                      | GUUCAGAGUUCUACAGUCCGACGAUCNNNAUCNNNAGUNNN                            |                                                                                                                                                                                                 |
|                                                                                  | RT primer                                                            | GCACCCGAGAATTCCANNNNNNNN                                             | DNA                                                                                                                                                                                             |
|                                                                                  | PCR 1 forward primer                                                 | CTACACGTTTACAGTTTCTACAGTCCGA                                         | DNA primers for the first PCR amplification                                                                                                                                                     |
|                                                                                  | PCR 1 reverse primer                                                 | GCCTTGGCACCCGAGAATTCCA                                               |                                                                                                                                                                                                 |
|                                                                                  | Forward (P5) primer                                                  | AATGATACGGCGACCACCGAGATCTACACGTTT AGAGTTCTACAGTCCGA                  | DNA primers for the second PCR amplification                                                                                                                                                    |
| Reverse (P7) primer                                                              | CAAGCAGAAGACGGCATAACGAGATXXXXXX<br>GTGACTGGAGTTCCTTGGCACCCGAGAATTCCA |                                                                      |                                                                                                                                                                                                 |



**Supplementary Table 6.** Number of Primary Spermatocytes and Amount of Spike-In Mix Used to Prepare Small RNA Sequencing Libraries

| Genotype                                                        | Trial | Cell number | Amount of spike-in, attomol |
|-----------------------------------------------------------------|-------|-------------|-----------------------------|
| C57BL/6                                                         | Rep1  | 31,400      | 370                         |
|                                                                 | Rep2  | 68,900      | 4000                        |
|                                                                 | Rep3  | 47,200      | 3000                        |
|                                                                 | Rep4  | 89,100      | 4000                        |
|                                                                 | Rep5  | 48,900      | 3000                        |
|                                                                 | Rep6  | 60,300      | 4000                        |
|                                                                 | Rep7  | 63,100      | 4000                        |
|                                                                 | Rep8  | 99,700      | 4000                        |
|                                                                 | Rep9  | 112,500     | 4000                        |
|                                                                 | Rep10 | 116,400     | 4000                        |
|                                                                 | Rep11 | 137,000     | 4000                        |
|                                                                 | Rep12 | 112,000     | 4000                        |
| <i>pi2<sup>-/-</sup>; pi9<sup>-/-</sup>; pi17<sup>-/-</sup></i> | Rep1  | 47,800      | 4000                        |
|                                                                 | Rep2  | 43,700      | 4000                        |
|                                                                 | Rep3  | 195,000     | 4000                        |
|                                                                 | Rep4  | 167,300     | 4000                        |
|                                                                 | Rep5  | 93,800      | 4000                        |
|                                                                 | Rep6  | 143,000     | 4000                        |
|                                                                 | Rep7  | 129,900     | 4000                        |
|                                                                 | Rep8  | 77,400      | 4000                        |
|                                                                 | Rep9  | 80,600      | 4000                        |
| <i>pi2<sup>-/-</sup></i>                                        | Rep1  | 44,400      | 4000                        |
| <i>pi7<sup>-/-</sup></i>                                        | Rep1  | 63,600      | 4000                        |
|                                                                 | Rep2  | 122,800     | 4000                        |
|                                                                 | Rep3  | 76,000      | 4000                        |
| <i>pi9<sup>-/-</sup></i>                                        | Rep1  | 42,700      | 4000                        |
| <i>pi17<sup>-/-</sup></i>                                       | Rep1  | 91,300      | 4000                        |

**Supplementary Table 7.** Number of Primary Spermatocytes and Amount of ERCC Mix Used to Prepare RNA Sequencing Libraries

| Genotype                                                        | Replicate | Cell number | Amount of spike-in, attomole<br>(1 $\mu$ l of 1/100 dilution of ERCC Mix 1) |
|-----------------------------------------------------------------|-----------|-------------|-----------------------------------------------------------------------------|
| C57BL/6                                                         | Rep1      | 103,800     | 1035.15                                                                     |
|                                                                 | Rep2      | 62,100      | 1035.15                                                                     |
|                                                                 | Rep3      | 67,400      | 1035.15                                                                     |
|                                                                 | Rep4      | 59,100      | 1035.15                                                                     |
|                                                                 | Rep5      | 102,600     | 1035.15                                                                     |
|                                                                 | Rep6      | 96,300      | 1035.15                                                                     |
| <i>pi2<sup>-/-</sup>; pi9<sup>-/-</sup>; pi17<sup>-/-</sup></i> | Rep1      | 98,400      | 1035.15                                                                     |
| <i>pi2<sup>-/-</sup></i>                                        | Rep1      | 89,200      | 1035.15                                                                     |
| <i>pi7<sup>-/-</sup></i>                                        | Rep1      | 191,700     | 1035.15                                                                     |
| <i>pi9<sup>-/-</sup></i>                                        | Rep1      | 63,100      | 1035.15                                                                     |
| <i>pi17<sup>-/-</sup></i>                                       | Rep1      | 111,900     | 1035.15                                                                     |
